# Supplementary material
Source: PubMed Central journal article supplement (PMC7049098)
Supplement: NIHMS1546898-supplement-1.pdf [file NIHMS1546898-supplement-1.pdf]

# Chemical functionality of Multidomain Peptide Hydrogels governs early host immune response

*Tania L. Lopez-Silva<sup>a</sup>, David G. Leach<sup>a</sup>, Alon Azares<sup>c</sup>, I-Che Li<sup>a</sup>, Darren G. Woodside<sup>c</sup>, Jeffrey D. Hartgerink<sup>a,b,\*</sup>*

<sup>a</sup> *Department of Chemistry, Rice University, Houston, Texas 77005, USA*

<sup>b</sup> *Department of Bioengineering, Rice University, Houston, Texas 77005, USA*

<sup>c</sup> *Department of Molecular Cardiology, Texas Heart Institute, Houston, Texas, 77030, USA*

**Corresponding Author**

\*Email: [jdh@rice.edu](mailto:jdh@rice.edu)

## Supporting Information

## Table of contents

|                                                                                                                                                                           |           |
|---------------------------------------------------------------------------------------------------------------------------------------------------------------------------|-----------|
| <b>Table S1.</b> Self-assembling Multidomain Peptides: peptide sequences and properties.                                                                                  | <b>3</b>  |
| <b>Figure S1.</b> MALDI TOF MS spectra of the diverse multidomain peptides: K <sub>2</sub> , R <sub>2</sub> , E <sub>2</sub> , D <sub>2</sub> .                           | <b>4</b>  |
| <b>Figure S2.</b> Viscoelastic properties of K <sub>2</sub> , R <sub>2</sub> , E <sub>2</sub> , D <sub>2</sub>                                                            | <b>5</b>  |
| <b>Table S2.</b> Peptide sequence and viscoelastic properties of Multidomain Peptides                                                                                     | <b>6</b>  |
| <b>Figure S3.</b> Subcutaneous injection model                                                                                                                            | <b>6</b>  |
| <b>Table S3.</b> Immunophenotyping antibodies used for the flow cytometry panels.                                                                                         | <b>7</b>  |
| <b>Table S4.</b> Flow cytometry parameters and configuration for all studied panels.                                                                                      | <b>8</b>  |
| <b>Figure S4.</b> Gating strategy and t-SNE clustering method for flow cytometry data analysis                                                                            | <b>9</b>  |
| <b>Figure S5.</b> H&E staining of the implant edge of K <sub>2</sub> , R <sub>2</sub> , E <sub>2</sub> , D <sub>2</sub> at day 3, 7 and 10 post-injection                 | <b>10</b> |
| <b>Figure S6.</b> H&E staining of the implant core of K <sub>2</sub> , R <sub>2</sub> , E <sub>2</sub> , D <sub>2</sub> at day 3, 7 and 10 post-injection.                | <b>10</b> |
| <b>Figure S7.</b> H&E staining of the whole implant of K <sub>2</sub> , R <sub>2</sub> , E <sub>2</sub> , D <sub>2</sub> at day 3 post-injection.                         | <b>11</b> |
| <b>Figure S8.</b> H&E staining of the whole implant of K <sub>2</sub> , R <sub>2</sub> , E <sub>2</sub> , D <sub>2</sub> at day 10 post-injection.                        | <b>12</b> |
| <b>Figure S9.</b> Cell density present in the MDP implants at different time points.                                                                                      | <b>13</b> |
| <b>Figure S10.</b> Collagen deposition and tissue remodeling of MDP hydrogel implants.                                                                                    | <b>13</b> |
| <b>Figure S11.</b> Masson's Trichrome staining of K <sub>2</sub> , R <sub>2</sub> , E <sub>2</sub> , D <sub>2</sub> at day 3 post-injection.                              | <b>14</b> |
| <b>Figure S12.</b> Masson's Trichrome staining of K <sub>2</sub> , R <sub>2</sub> , E <sub>2</sub> , D <sub>2</sub> at day 7 post-injection.                              | <b>15</b> |
| <b>Figure S13.</b> Masson's Trichrome staining of K <sub>2</sub> , R <sub>2</sub> , E <sub>2</sub> , D <sub>2</sub> at day 10 post-injection.                             | <b>16</b> |
| <b>Figure S14.</b> Immunostaining of alpha-smooth-muscle actin                                                                                                            | <b>17</b> |
| <b>Figure S15.</b> Immunostaining of alpha-smooth-muscle actin K <sub>2</sub> , R <sub>2</sub> , E <sub>2</sub> , D <sub>2</sub> at day 3 post-injection.                 | <b>18</b> |
| <b>Figure S16.</b> Immunostaining of alpha-smooth-muscle actin of K <sub>2</sub> , R <sub>2</sub> , E <sub>2</sub> , D <sub>2</sub> at day 7 post-injection               | <b>19</b> |
| <b>Figure S17.</b> Immunostaining of alpha-smooth-muscle actin of K <sub>2</sub> , R <sub>2</sub> , E <sub>2</sub> , D <sub>2</sub> at day 10 post-injection.             | <b>20</b> |
| <b>Figure S18.</b> Gating strategy for the immunophenotyping of myeloid cells in the MDP hydrogels.                                                                       | <b>21</b> |
| <b>Figure S19.</b> Gating strategy for the immunophenotyping of lymphoid cells in the MDP hydrogels.                                                                      | <b>22</b> |
| <b>Figure S20.</b> Immunophenotyping of infiltrating cells in E <sub>2</sub> implants at day 3.                                                                           | <b>23</b> |
| <b>Figure S21.</b> Percentage of different lymphoid cell phenotypes from CD45 <sup>+</sup> cells present in K <sub>2</sub> implants at day 1, 3, 7 and 10 post-injection. | <b>24</b> |
| <b>Figure S22.</b> Quantification of IL-4 and INF- $\gamma$ from the implant lysate.                                                                                      | <b>24</b> |
| <b>Figure S23.</b> Gating strategy for the immunophenotyping of stem cells in the MDP hydrogels.                                                                          | <b>25</b> |

**Table S1.** Self-assembling Multidomain Peptides: peptide sequences and properties.

| Name                 | Sequence                              | Monoisotopic<br>mass (Da) | Molecular<br>weight (Da) | Molar<br>concentration of<br>1wt. % solution |
|----------------------|---------------------------------------|---------------------------|--------------------------|----------------------------------------------|
| <b>K<sub>2</sub></b> | Ac-KKSLSLSLSLSLKK-CONH <sub>2</sub>   | 1772.103                  | 1773.171                 | 5.6 mM                                       |
| <b>E<sub>2</sub></b> | Ac-EESLSLSLSLSLSLEE-CONH <sub>2</sub> | 1775.893                  | 1776.937                 | 5.6 mM                                       |
| <b>R<sub>2</sub></b> | Ac-RRSLSLSLSLSLSLRR-CONH <sub>2</sub> | 1885.225                  | 1884.127                 | 5.3 mM                                       |
| <b>D<sub>2</sub></b> | Ac-DDSLSLSLSLSLSLDD-CONH <sub>2</sub> | 1720.829                  | 1719.83                  | 5.8 mM                                       |

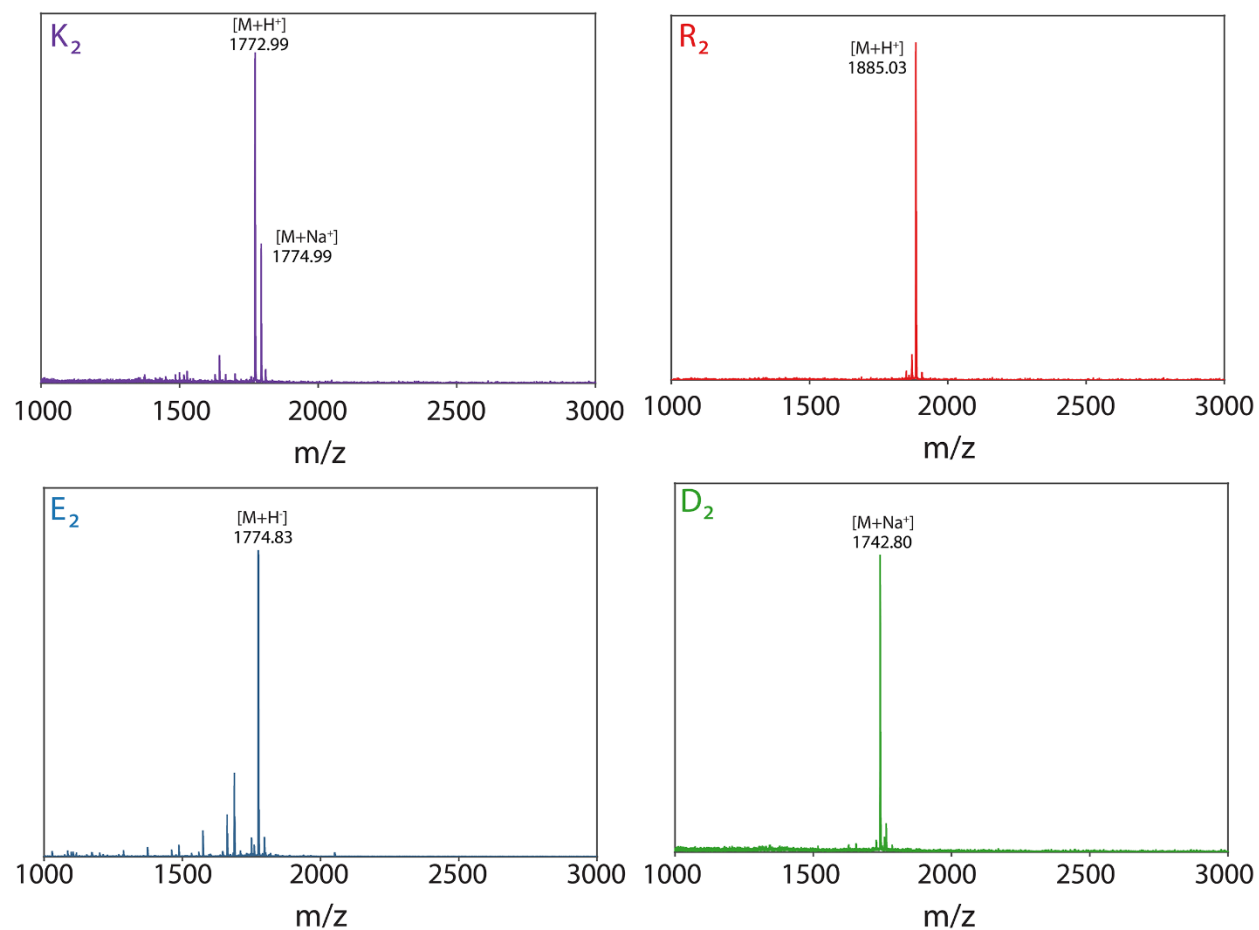

**Figure S1.** MALDI TOF MS spectra of the diverse multidomain peptides: K<sub>2</sub>, R<sub>2</sub>, E<sub>2</sub>, D<sub>2</sub>.

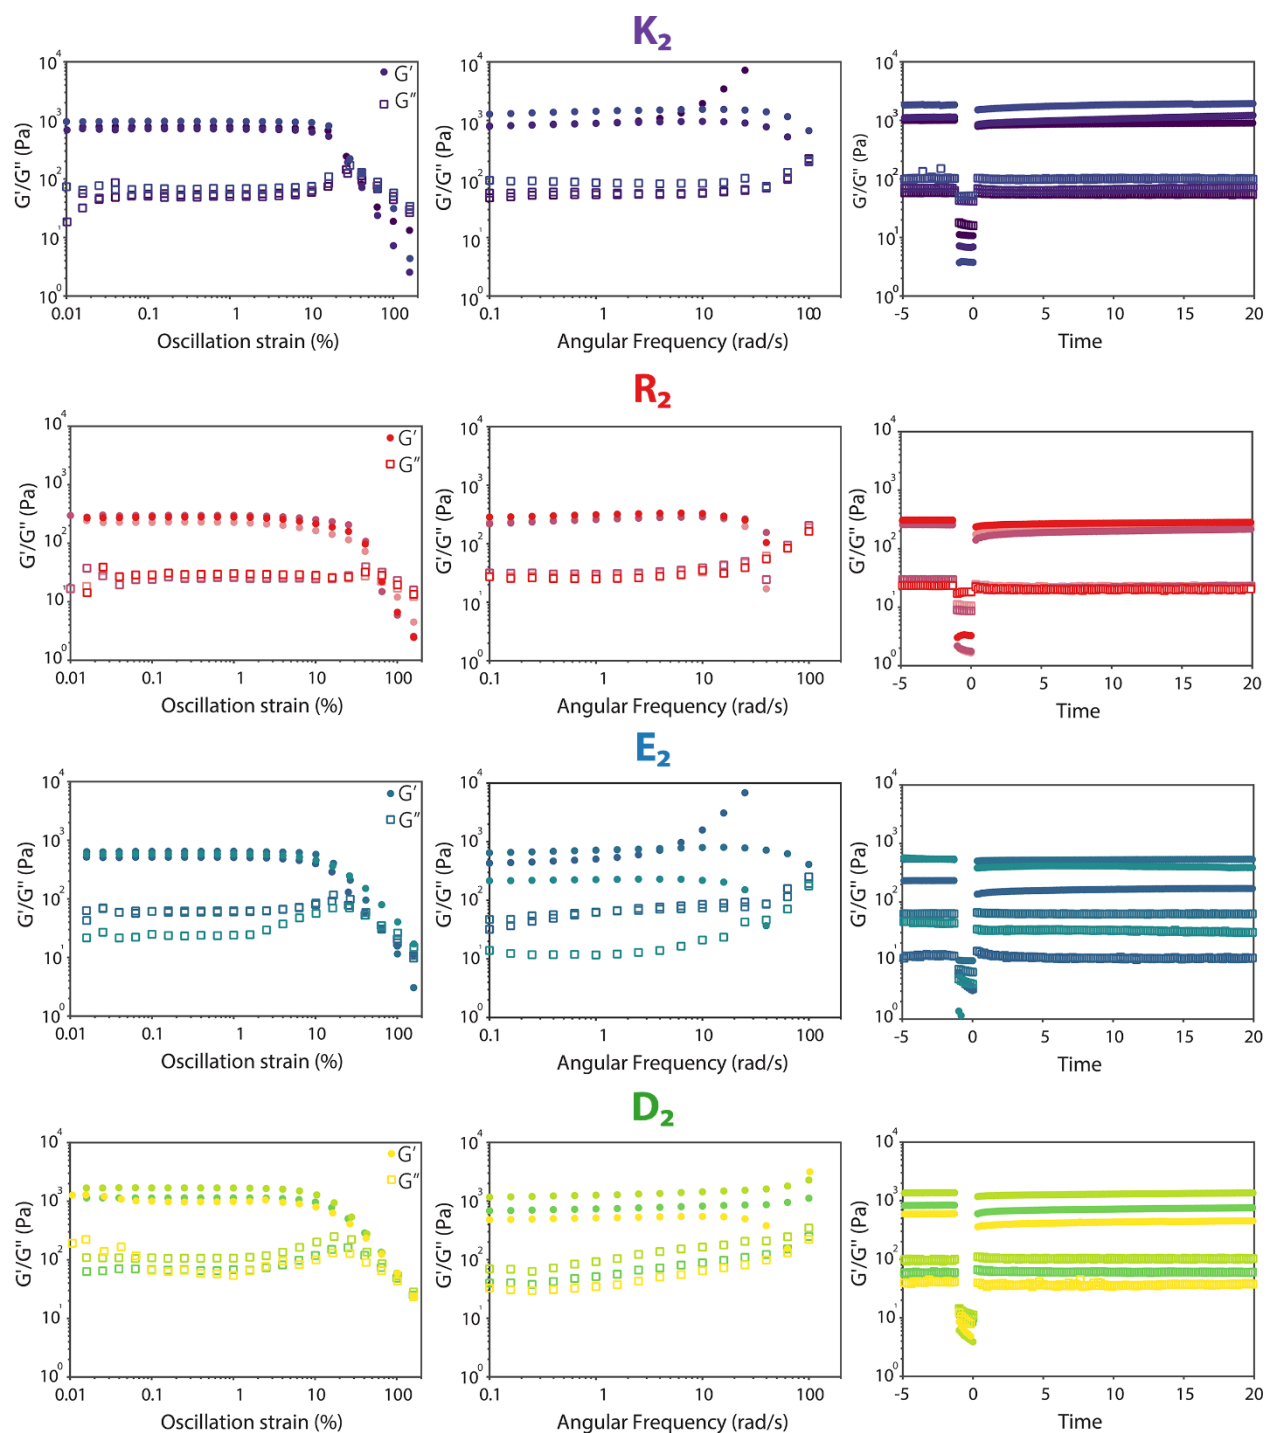

**Figure S2.** Viscoelastic properties of K<sub>2</sub>, R<sub>2</sub>, E<sub>2</sub>, D<sub>2</sub> at 1% by weight in 149 mM sucrose 0.5X HBSS (amplitude sweep, frequency sweep and strain recovery). b) Storage and loss moduli of MDPs at 1% oscillatory strain. Peptide materials were analyzed in triplicate, all experimental results are shown in each plot.

**Table S2.** Peptide sequence and viscoelastic properties of Multidomain Peptides with different ionic domains. All peptides at 1% by weight in buffer form hydrogels that recover their viscoelastic properties after a shearing process.

| Peptide              | Sequence                                  | G' (Pa)    | G'' (Pa) | Shear Recovery (%) |         |
|----------------------|-------------------------------------------|------------|----------|--------------------|---------|
|                      |                                           |            |          | 1 min              | 20 min  |
| <b>K<sub>2</sub></b> | Ac-KKSLSLSLSLSLSLKK-CONH <sub>2</sub>     | 819 ± 131  | 57 ± 9   | 82 ± 4             | 100 ± 9 |
| <b>R<sub>2</sub></b> | Ac-RRSLSLSLSLSLSLRR-<br>CONH <sub>2</sub> | 269 ± 37   | 28 ± 2   | 71 ± 9             | 87 ± 4  |
| <b>E<sub>2</sub></b> | Ac-EESLSLSLSLSLEE-CONH <sub>2</sub>       | 579 ± 70   | 49 ± 22  | 77 ± 16            | 82 ± 15 |
| <b>D<sub>2</sub></b> | Ac-DDSLSLSLSLSLSLDD-<br>CONH <sub>2</sub> | 1271 ± 365 | 76 ± 27  | 81 ± 13            | 88 ± 12 |

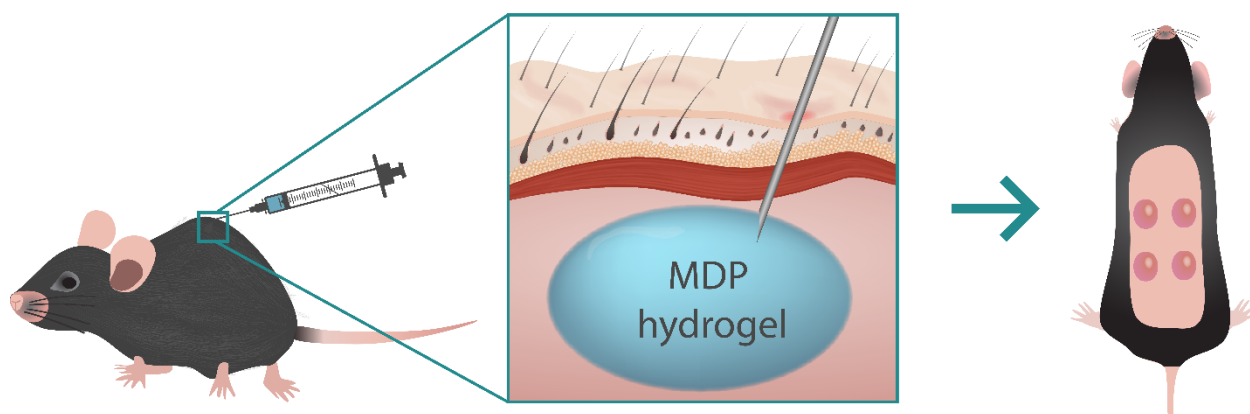

**Figure S3.** Subcutaneous injection model to evaluate the early host immune response to MDP hydrogels. Four injections of MDP hydrogel were distributed along the dorsal subcutaneous space.

**Table S3.** Immunophenotyping antibodies used for the flow cytometry panels.

| Antibody                          | Clone     | Isotype                                  | Conjugate          | Company        | Catalog # |
|-----------------------------------|-----------|------------------------------------------|--------------------|----------------|-----------|
| <i>Myeloid Panel</i>              |           |                                          |                    |                |           |
| CD45                              | 30-F11    | Rat IgG <sub>2b</sub> , κ                | APC-Cy7            | BD Biosciences | 561037    |
| Gr-1                              | RB6-8C5   | Rat IgG <sub>2b</sub> , κ                | APC                | BD Biosciences | 561083    |
| Ly-6C                             | AL-21     | Rat IgM, κ                               | PE-Cy7             | BD Biosciences | 560593    |
| CD11b                             | M1/70     | Rat IgG <sub>2b</sub> , κ                | FITC               | BD Biosciences | 561688    |
| F4/80                             | T45-2342  | Rat IgG <sub>2a</sub> , κ                | BV421              | BD Biosciences | 565411    |
| <i>Lymphoid Panel</i>             |           |                                          |                    |                |           |
| CD45                              | 30-F11    | Rat IgG <sub>2b</sub> , κ                | APC-Cy7            | BD Biosciences | 561037    |
| NK-1.1                            | PK136     | Mouse IgG <sub>2a</sub> , κ              | PE                 | BD Biosciences | 561046    |
| CD11b                             | M1/70     | Rat IgG <sub>2b</sub> , κ                | FITC               | BD Biosciences | 561688    |
| CD3e                              | 145-2C11  | Armenian<br>Hamster IgG <sub>1</sub> , κ | BV510              | BD Biosciences | 563024    |
| CD8a                              | 53-6.7    | Rat IgG <sub>2a</sub> , κ                | BV711              | BD Biosciences | 563046    |
| CD4                               | GK1.5     | Rat IgG <sub>2b</sub> , κ                | BUV395             | BD Biosciences | 563790    |
| CD19                              | 1D3       | Rat IgG <sub>2a</sub> , κ                | BUV737             | BD Biosciences | BUV737    |
| <i>Stem Cell Panel</i>            |           |                                          |                    |                |           |
| CD45                              | 30-F11    | Rat IgG <sub>2b</sub> , κ                | APC-Cy7            | BD Biosciences | 561037    |
| CD105                             | MJ7/18    | Rat IgG <sub>2a</sub> , κ                | Alexa Fluor<br>647 | BD Biosciences | 562761    |
| Ly6A-E (Sca-1)                    | E13-161.7 | Ray IgG <sub>2a</sub> , κ                | PE                 | BD Biosciences | 553336    |
| CD38                              | 90/CD38   | Rat IgG <sub>2a</sub> , κ                | PerCP-Cy5.5        | BD Biosciences | 562770    |
| CD11b                             | M1/70     | Rat IgG <sub>2b</sub> , κ                | FITC               | BD Biosciences | 561688    |
| CD29                              | Ha2/5     | Hamster IgM, κ                           | BV421              | BD Biosciences | 564131    |
| CD117                             | 2B8       | Rat IgG <sub>2b</sub> , κ                | BUV395             | BD Biosciences | 564011    |
| <i>Isotype Controls and other</i> |           |                                          |                    |                |           |
| Rat IgG <sub>2b</sub> , κ         | A95-1     |                                          | FITC               | BD Biosciences | 553988    |
| Rat IgM, κ                        | R4-22     |                                          | PE-Cy7             | BD Biosciences | 560572    |
| Rat IgG <sub>2a</sub> , κ         | R35-95    |                                          | BV421              | BD Biosciences | 562602    |
| Mouse IgG <sub>2a</sub> , κ       | G155-178  |                                          | PE                 | BD Biosciences | 553457    |
| Rat IgG <sub>2a</sub> , κ         | R35-95    |                                          | BUV737             | BD Biosciences | 564294    |
| Rat IgG <sub>2b</sub> , κ         | A95-1     |                                          | APC-Cy7            | BD Biosciences | 552773    |
| Rat IgG <sub>2b</sub> , κ         | A95-1     |                                          | APC                | BD Biosciences | 553991    |
| Hamster IgG <sub>1</sub> , κ      | A19-3     |                                          | BV510              | BD Biosciences | 563197    |
| Rat IgG <sub>2a</sub> , κ         | R35-95    |                                          | BV711              | BD Biosciences | 563047    |
| Rat IgG <sub>2b</sub> , κ         | R35-38    |                                          | BUV395             | BD Biosciences | 563560    |
| Blue live/dead                    |           |                                          |                    | Invitrogen     | L38961    |

**Table S4.** Flow cytometry parameters and configuration for all studied panels.**Myeloid Panel**

| Laser           | Marker             | Fluorophore | Filter |
|-----------------|--------------------|-------------|--------|
| Red (633 nm)    | CD45               | APC-Cy7     | 780/60 |
|                 | Gr-1 (Ly6C & Ly6G) | APC         | 660/20 |
| Y&G (561 nm)    | Ly-6C              | PE-Cy7      | 780/60 |
| Blue (488 nm)   | CD11b              | FITC        | 530/30 |
| Violet (407 nm) | F4/80              | BV421       | 450/50 |
| UV (355 nm)     | Live/dead Blue     |             | 450/50 |

**Lymphoid Panel**

| Laser           | Marker         | Fluorophore | Filter |
|-----------------|----------------|-------------|--------|
| Red (633 nm)    | CD45           | APC-Cy7     | 780/60 |
| Y&G (561 nm)    | NK-1.1         | PE          | 585/15 |
| Blue (488 nm)   | CD11b          | FITC        | 530/30 |
| Violet (407 nm) | CD3e           | BV510       | 525/50 |
|                 | CD8a           | BV711       | 710/50 |
| UV (355 nm)     | CD4            | BUV395      | 379/28 |
|                 | CD19           | BUV737      | 740/35 |
|                 | Live/dead Blue |             | 450/50 |

**Stem Cell Panel**

| Laser           | Marker    | Fluorophore     | Filter |
|-----------------|-----------|-----------------|--------|
| Red (633 nm)    | CD45      | APC-Cy7         | 780/60 |
|                 | CD105     | Alexa Fluor 647 | 660/20 |
| Y&G (561 nm)    | Ly6A-E    | PE              | 585/15 |
|                 | CD38      | PerCP-Cy5.5     | 695/40 |
| Blue (488 nm)   | CD11b     | FITC            | 530/30 |
| Violet (407 nm) | CD29      | BV421           | 450/50 |
| UV (355 nm)     | CD117     | BUV395          | 379/28 |
|                 | Live/dead |                 | 450/50 |

## t-SNE clustering strategy

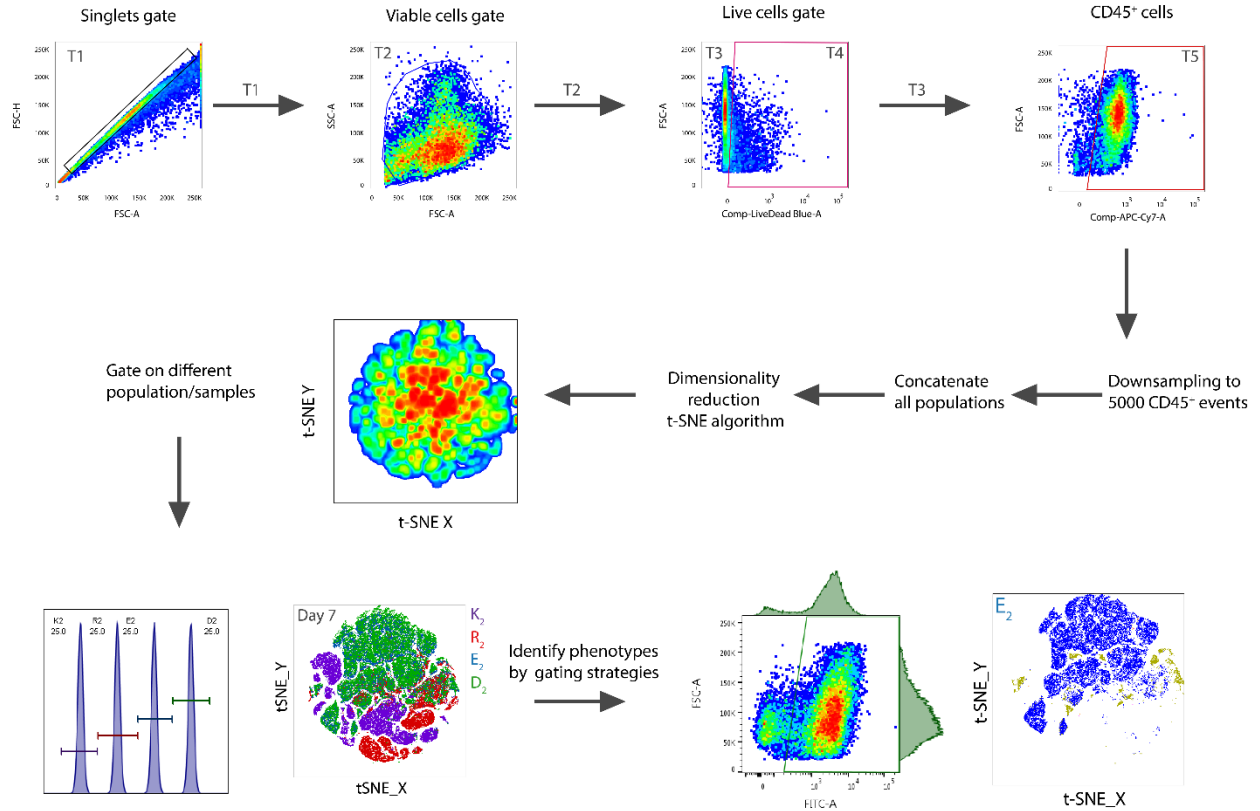

**Figure S4.** Gating strategy and t-SNE clustering method for flow cytometry data analysis. Singlets cells were gated from FSC-H vs FSC-A, followed by viable cells discrimination. Then live/dead gating was used to take live cells only and from them CD45<sup>+</sup> immune cells were gated. All samples from each peptide or timepoint were downsampled to 5000 CD45 positive events and concatenated in a single FCS file. Dimensionality reduction by the t-SNE algorithm was performed using FlowJo v10 with the following parameters: 1000 iteration, perplexity value 30, eta value 200 and theta of 0.5. Clusters were gated according to the peptide or timepoint as well as phenotype using the myeloid strategy shown in Figure S18.

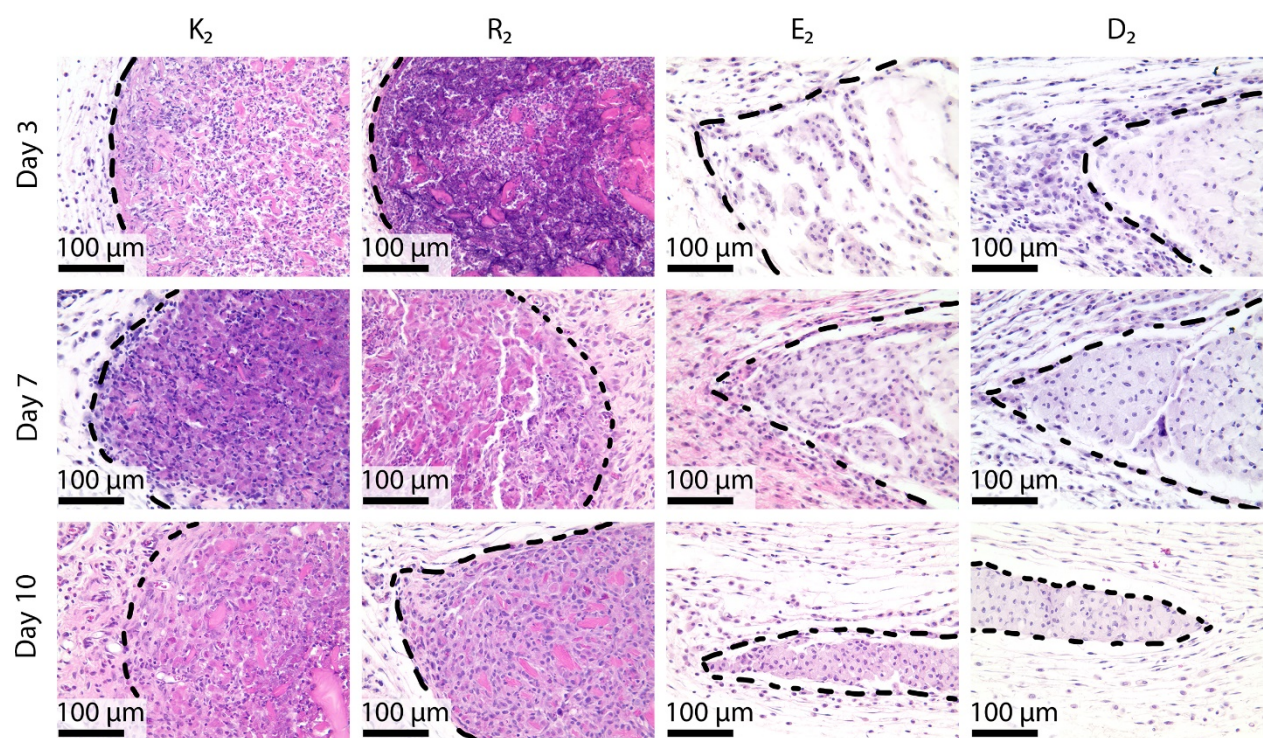

**Figure S5.** H&E staining of the implant edge of K<sub>2</sub>, R<sub>2</sub>, E<sub>2</sub>, D<sub>2</sub> at day 3, 7 and 10 post-injection. Scale bar: 100 μm.

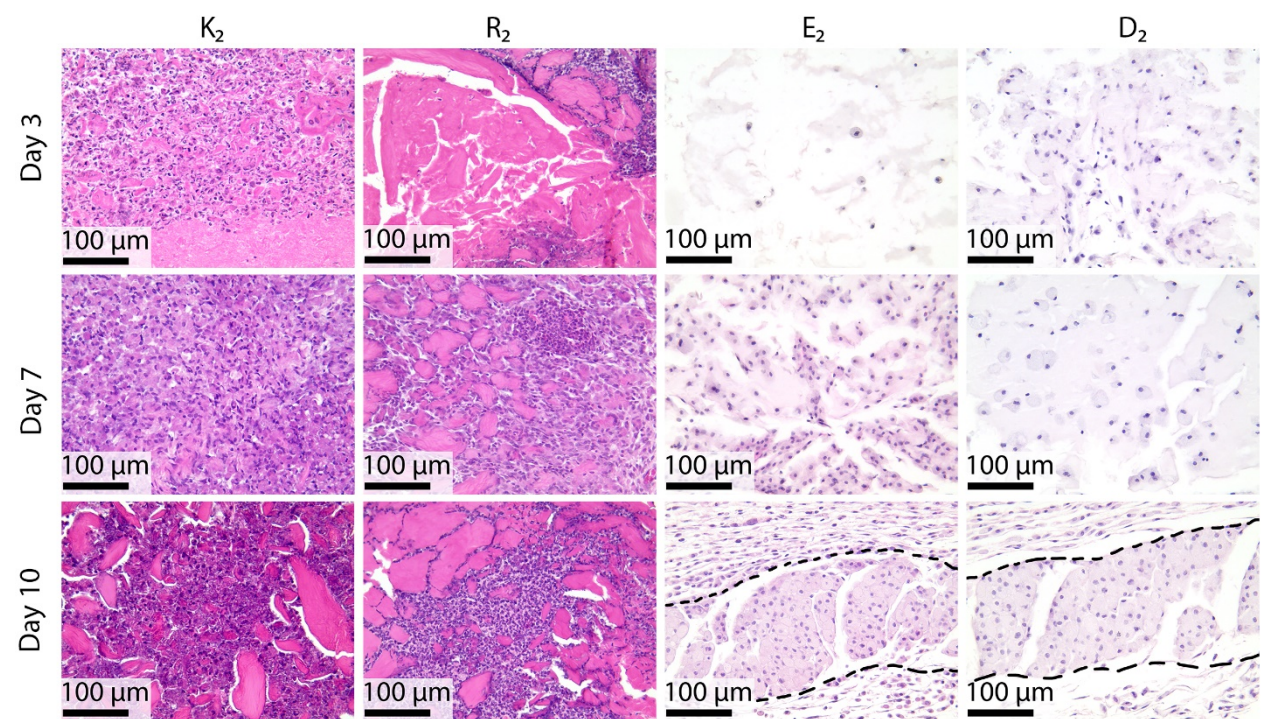

**Figure S6.** H&E staining of the implant core of K<sub>2</sub>, R<sub>2</sub>, E<sub>2</sub>, D<sub>2</sub> at day 3, 7 and 10 post-injection. Scale bar: 100 μm.

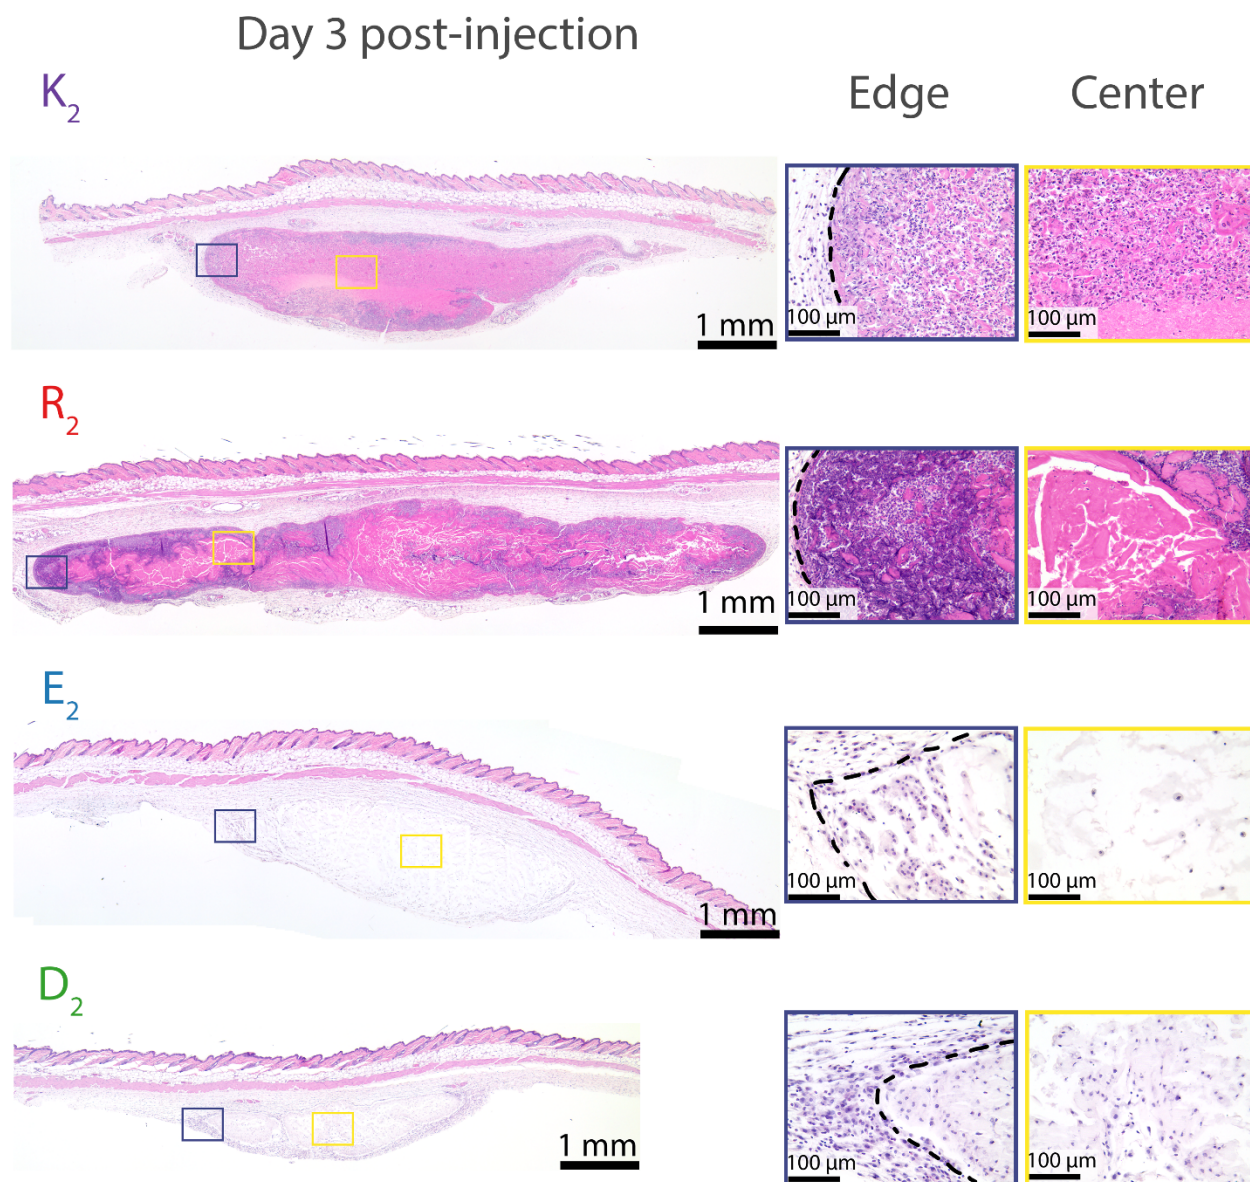

**Figure S7.** H&E staining of the whole implant of  $K_2$ ,  $R_2$ ,  $E_2$ ,  $D_2$  at day 3 post-injection. the purple box represents the area of the implant edge. The yellow box represents the area of the implant center. Dash lines represent the hydrogel in the subcutaneous space. Scale bar: 1 mm.

## Day 10 post-injection

$K_2$

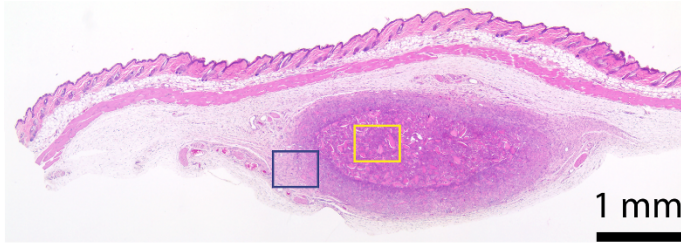

Edge

Center

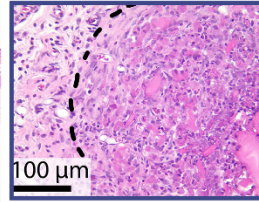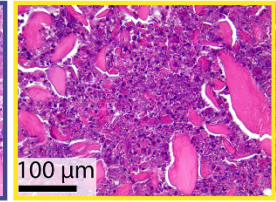

$R_2$

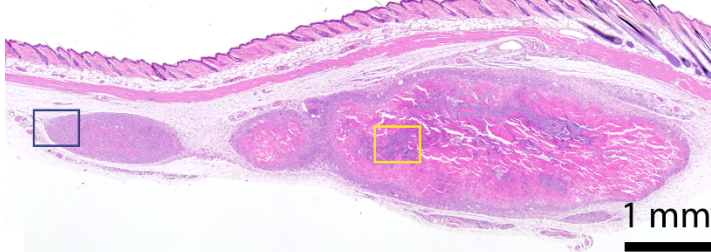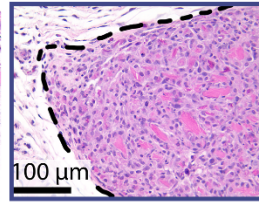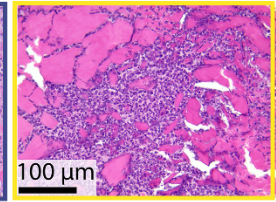

$E_2$

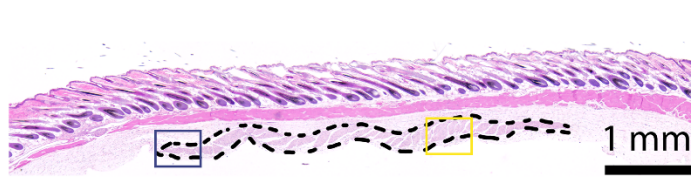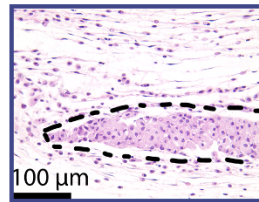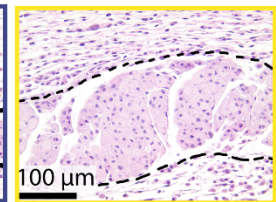

$D_2$

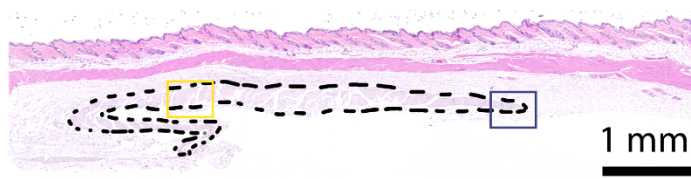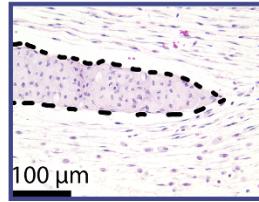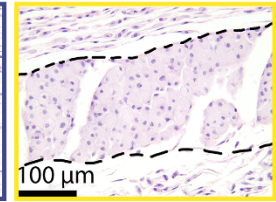

**Figure S8.** H&E staining of the whole implant of  $K_2$ ,  $R_2$ ,  $E_2$ ,  $D_2$  at day 10 post-injection. The purple box represents the area of the implant edge. The yellow box represents the area of the implant center. Dash lines represent the hydrogel in the subcutaneous space. Scale bar: 1 mm.

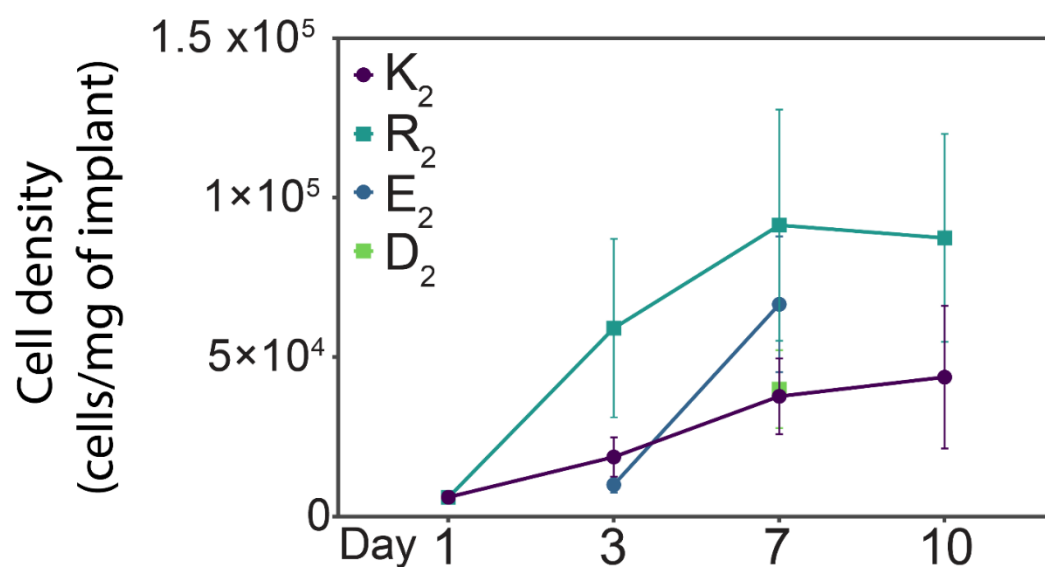

**Figure S9.** Cell density present in the MDP implants at different time points.

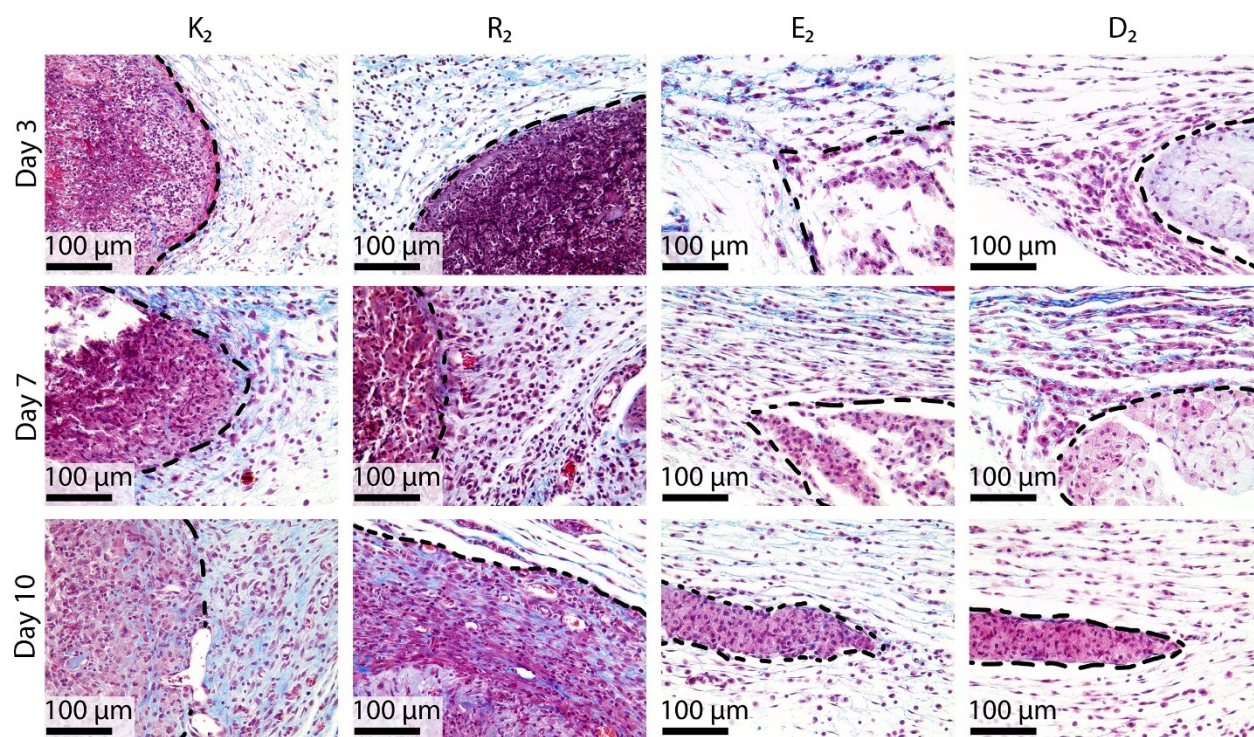

**Figure S10.** Collagen deposition and tissue remodeling of MDP hydrogel implants. Masson's Trichrome staining of implant cross-sections at day 3, 7 and 10 post-injection to observe collagen deposition in color blue. Images represent the interface between hydrogel and native tissue. By Day 10, K<sub>2</sub> and in particular R<sub>2</sub> show larger collagen deposition, whereas the negatively-charged MDPs have been degraded and remodeled into native tissue.

## Day 3 post-injection

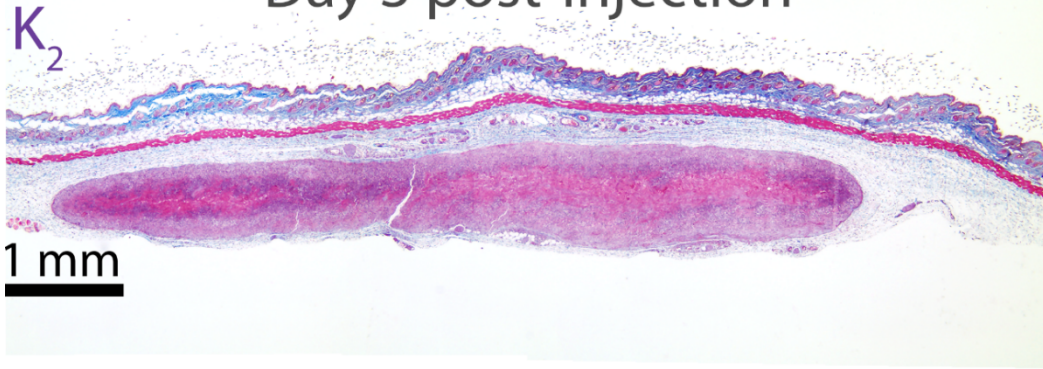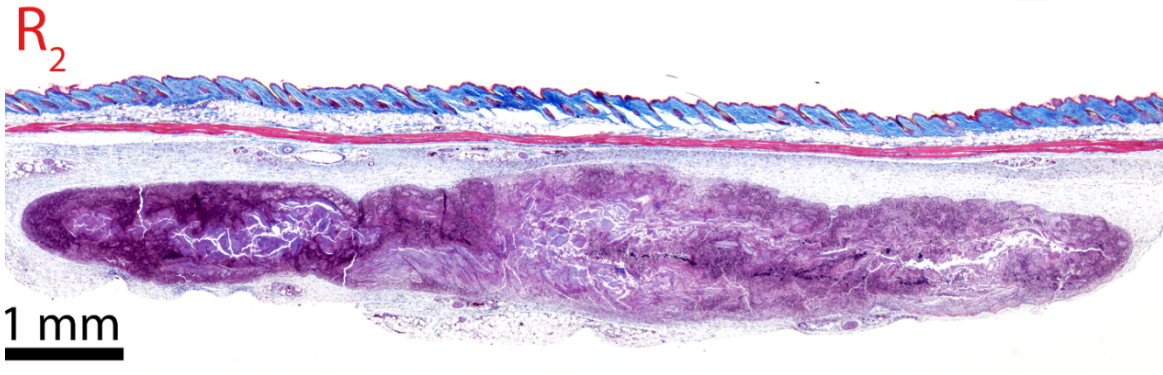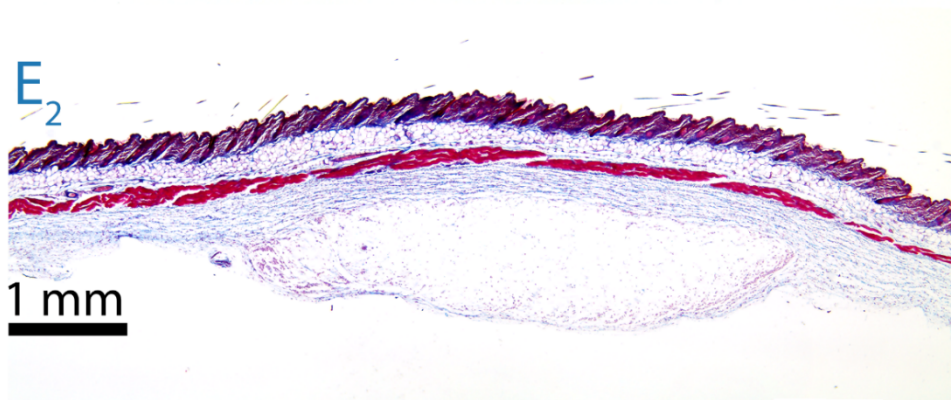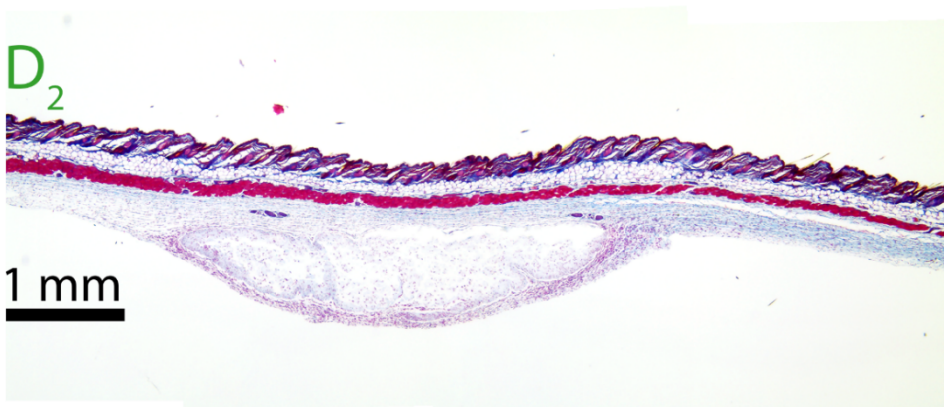

**Figure S11.** Masson's Trichrome staining of the whole implant of  $K_2$ ,  $R_2$ ,  $E_2$ ,  $D_2$  at day 3 post-injection. Scale bar: 1 mm.

## Day 7 post-injection

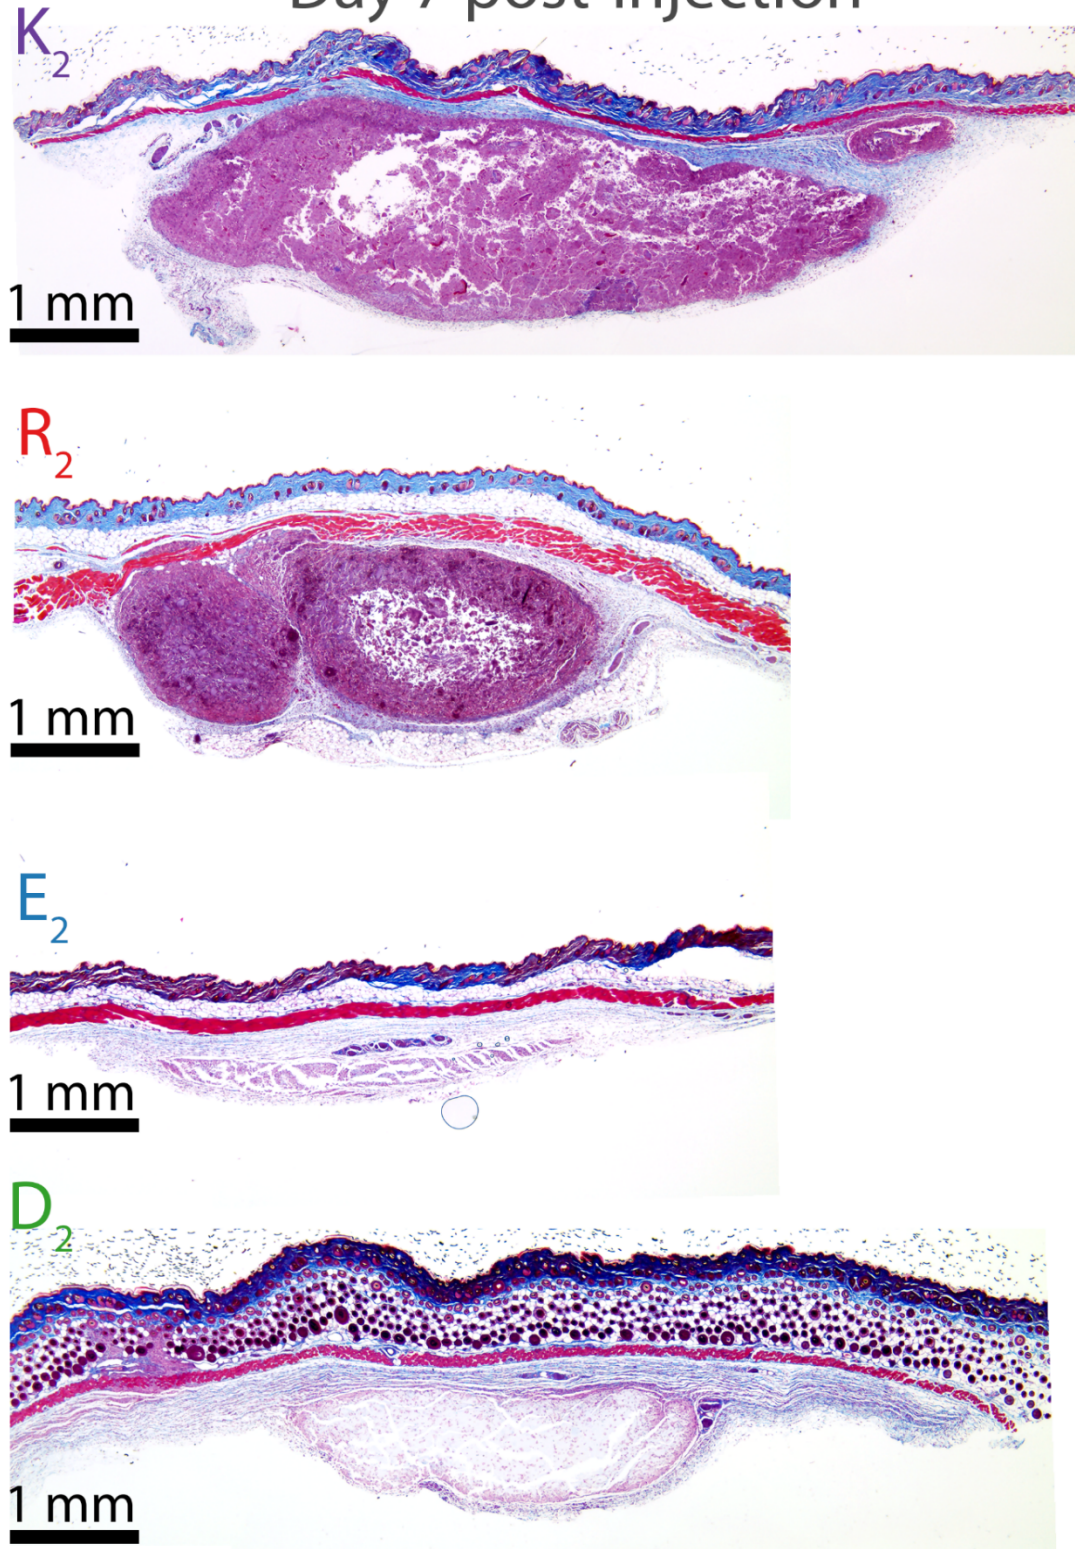

**Figure S12.** Masson's Trichrome staining of the whole implant of K<sub>2</sub>, R<sub>2</sub>, E<sub>2</sub>, D<sub>2</sub> at day 7 post-injection. Scale bar: 1 mm.

## Day 10 post-injection

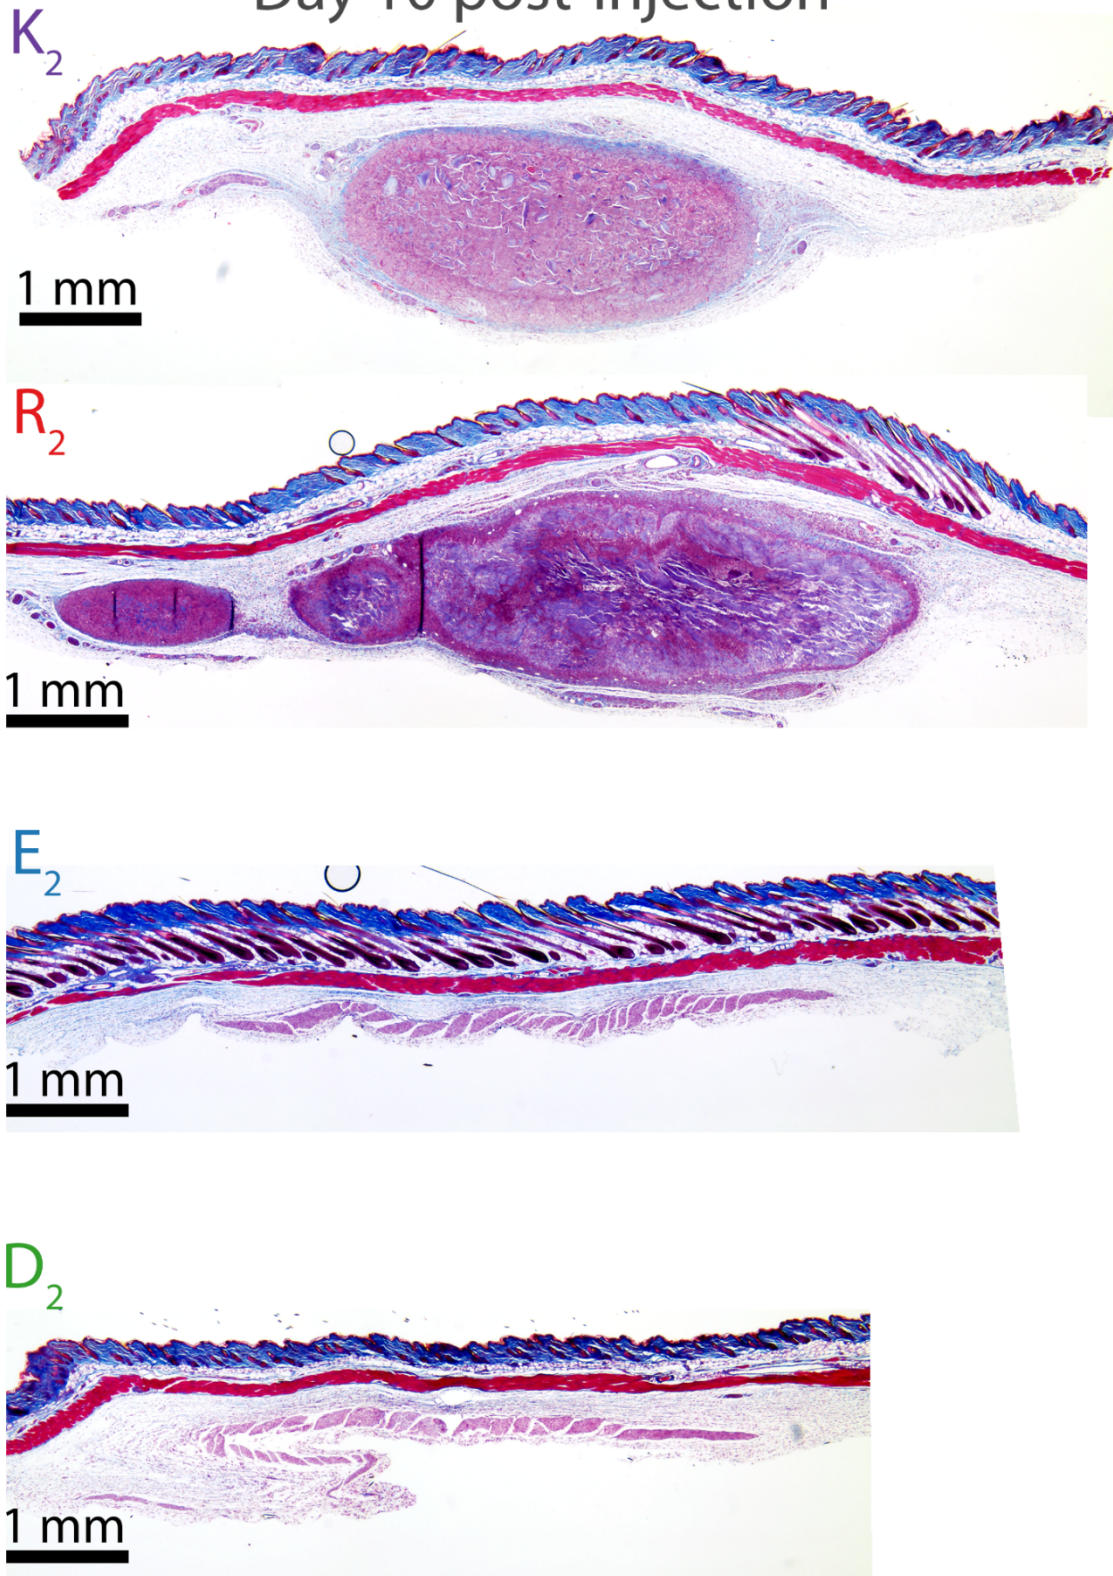

**Figure S13.** Masson's Trichrome staining of the whole implant of K<sub>2</sub>, R<sub>2</sub>, E<sub>2</sub>, D<sub>2</sub> at day 10 post-injection. Scale bar: 1 mm.

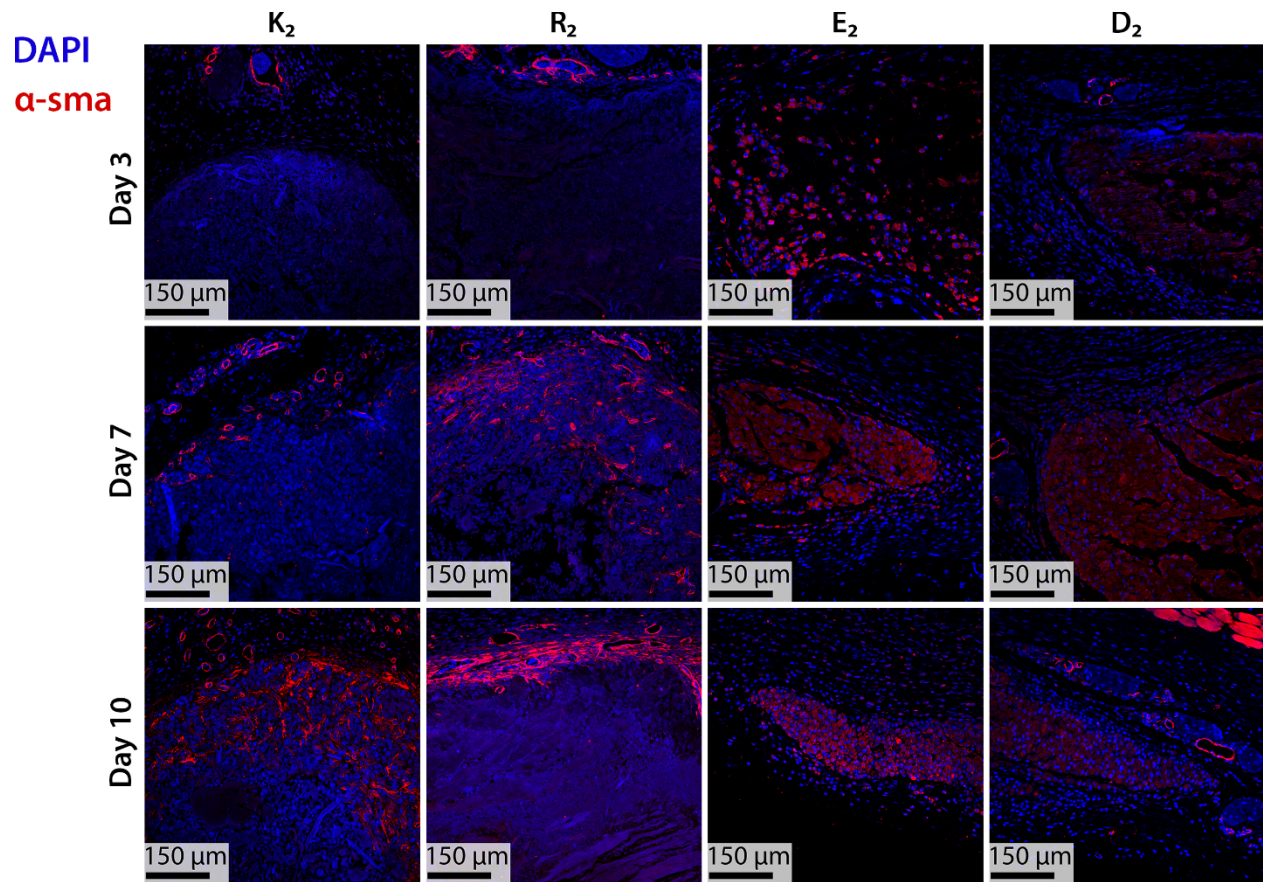

**Figure S14.** Immunostaining of alpha-smooth-muscle actin at the edge of the implants at day 3, 7 and 10 post-injection. Positive  $\alpha$ -sma expression is shown in red and cell nuclei in blue (DAPI staining). Scale bar 150  $\mu$ m.

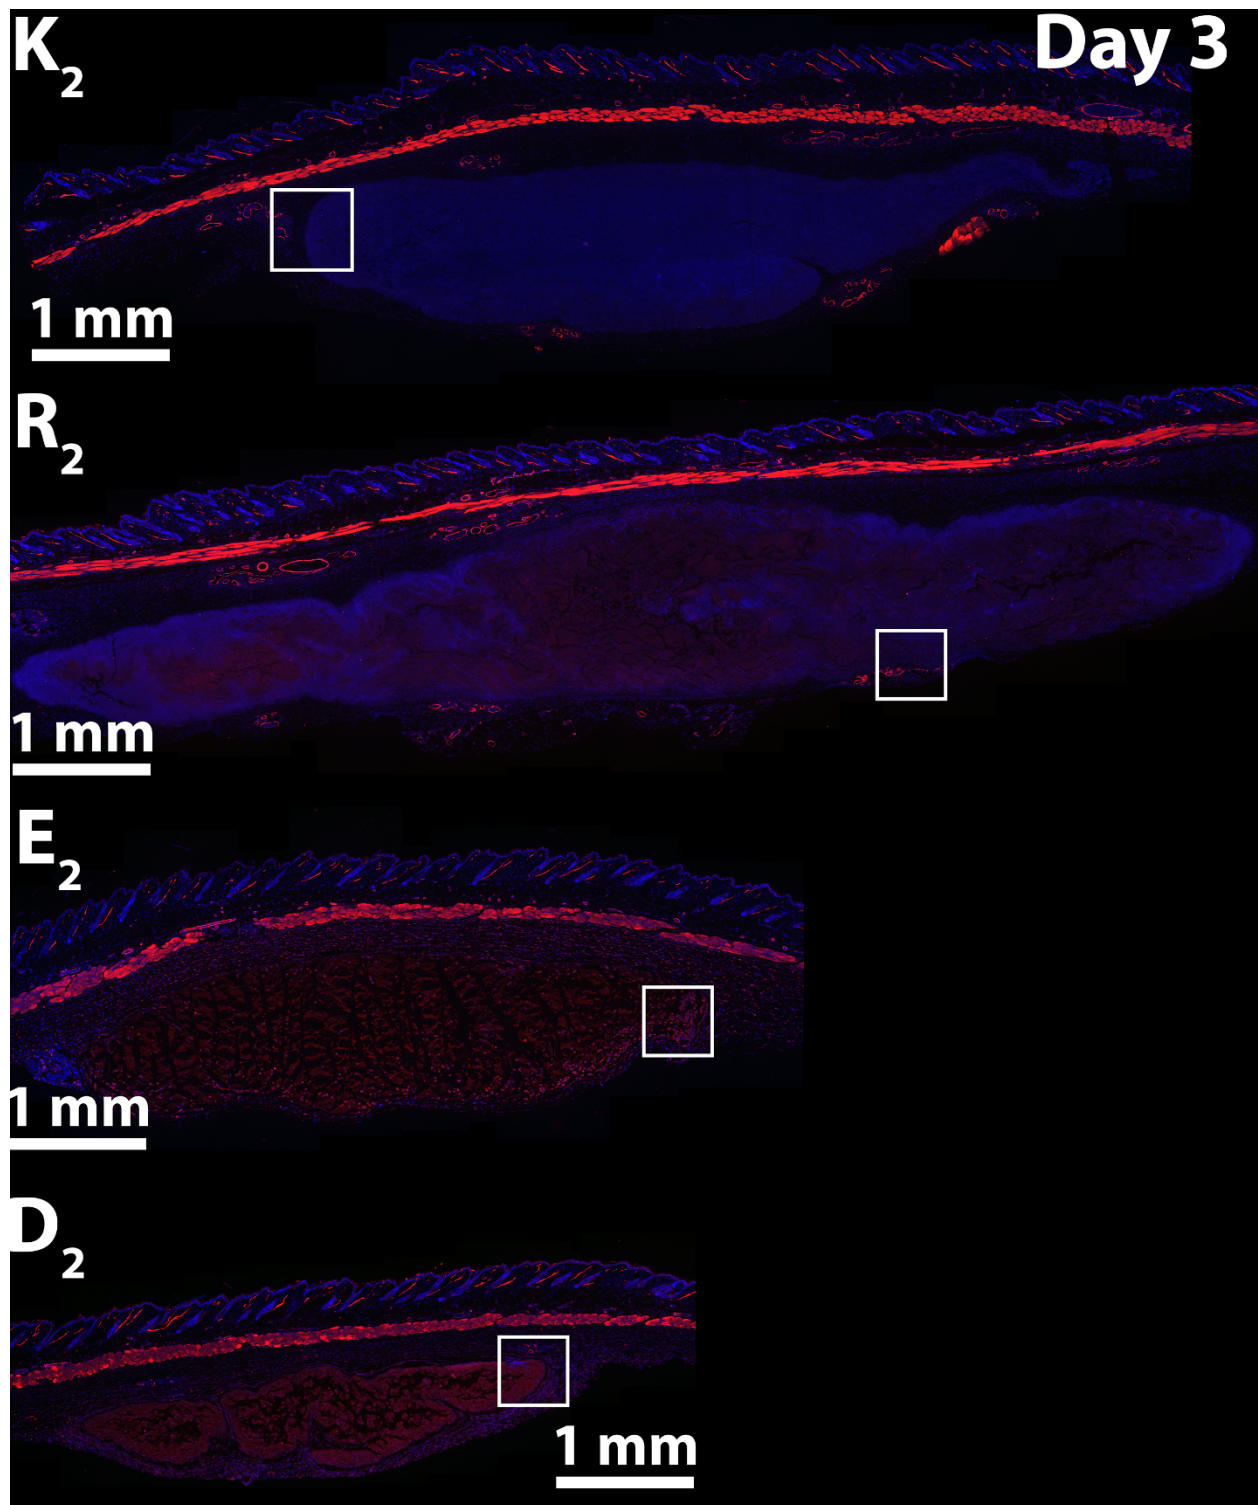

**Figure S15.** Immunostaining of alpha-smooth-muscle actin (red) and cell nuclei (blue) of the whole implant of  $K_2$ ,  $R_2$ ,  $E_2$ ,  $D_2$  at day 3 post-injection. Scale bar: 1 mm.

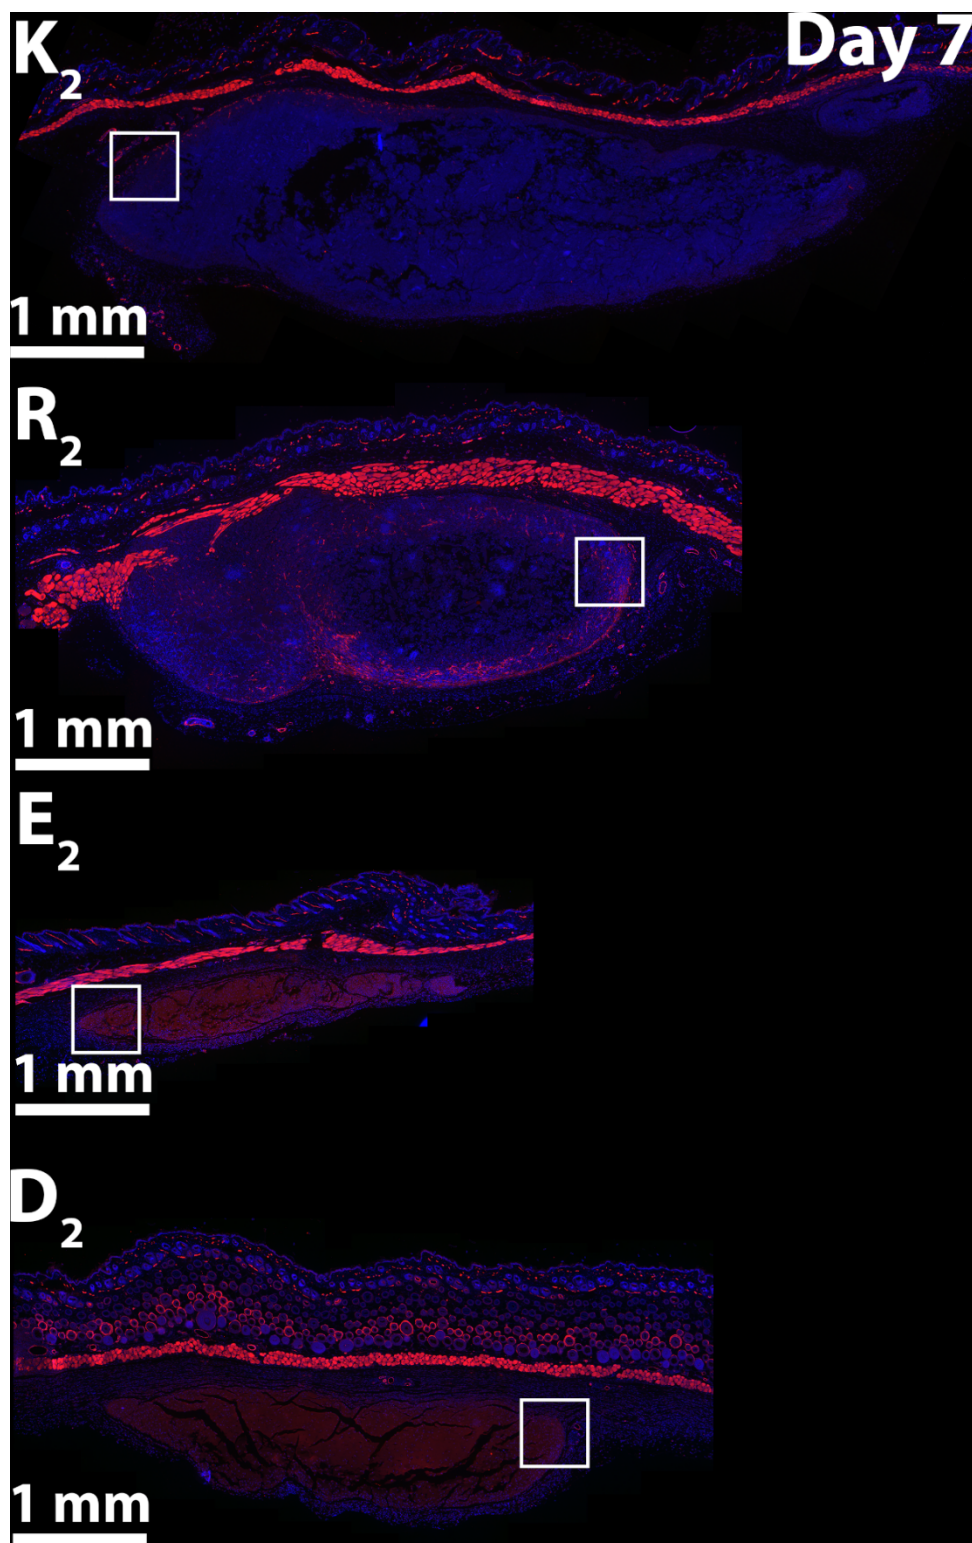

**Figure S16.** Immunostaining of alpha-smooth-muscle actin (red) and cell nuclei (blue) of the whole implant of K<sub>2</sub>, R<sub>2</sub>, E<sub>2</sub>, D<sub>2</sub> at day 7 post-injection. Scale bar: 1 mm.

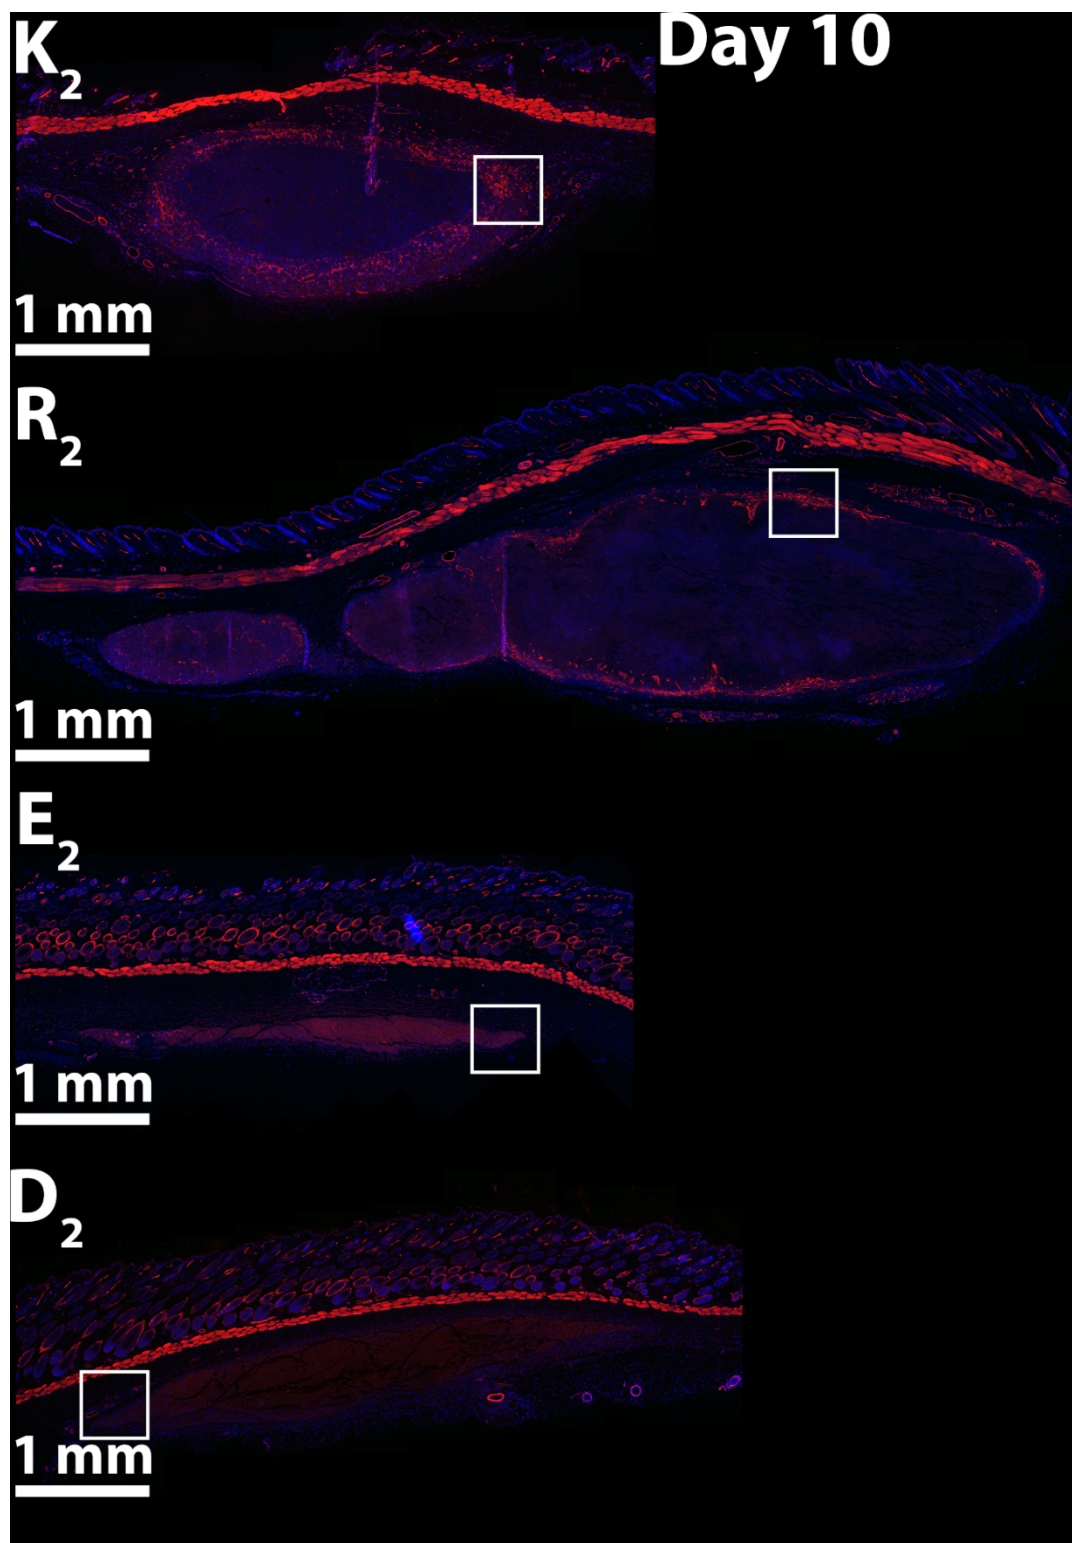

**Figure S17.** Immunostaining of alpha-smooth-muscle actin (red) and cell nuclei (blue) of the whole implant of  $K_2$ ,  $R_2$ ,  $E_2$ ,  $D_2$  at day 10 post-injection. Scale bar: 1 mm.

## Myeloid Panel Gating strategy

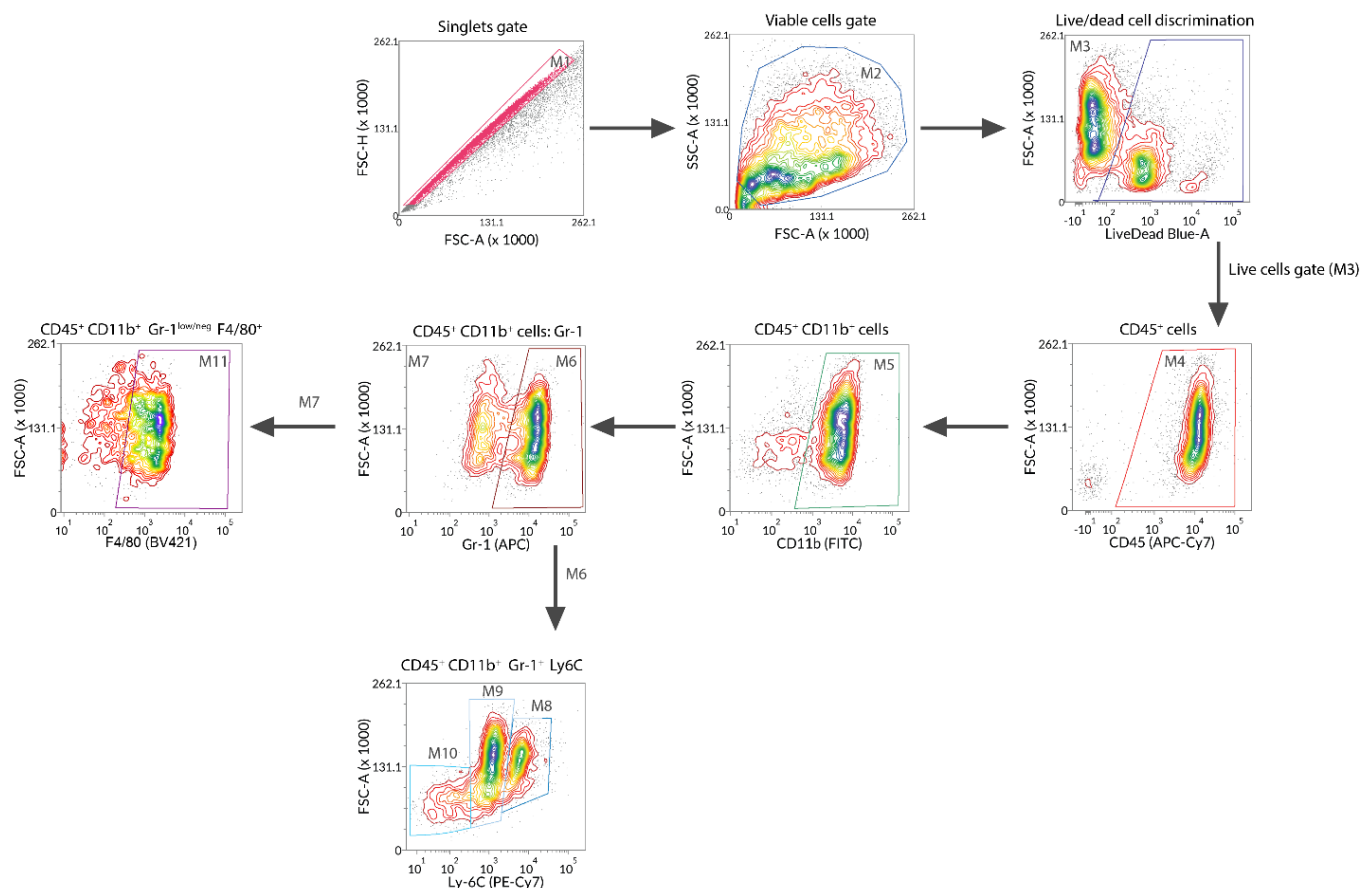

**Figure S18.** Gating strategy for the immunophenotyping of myeloid cells in the MDP hydrogels. M1 single cells after doubles discrimination (FSC-A vs FSC-H). M2 viable cells from M1. M3 Live cells after live/dead discrimination followed by immune CD45<sup>+</sup> cell gating. Immune cells of myeloid origin (M5) were classified according to Gr-1, Ly6C and F4/80 expression (M6-M11).

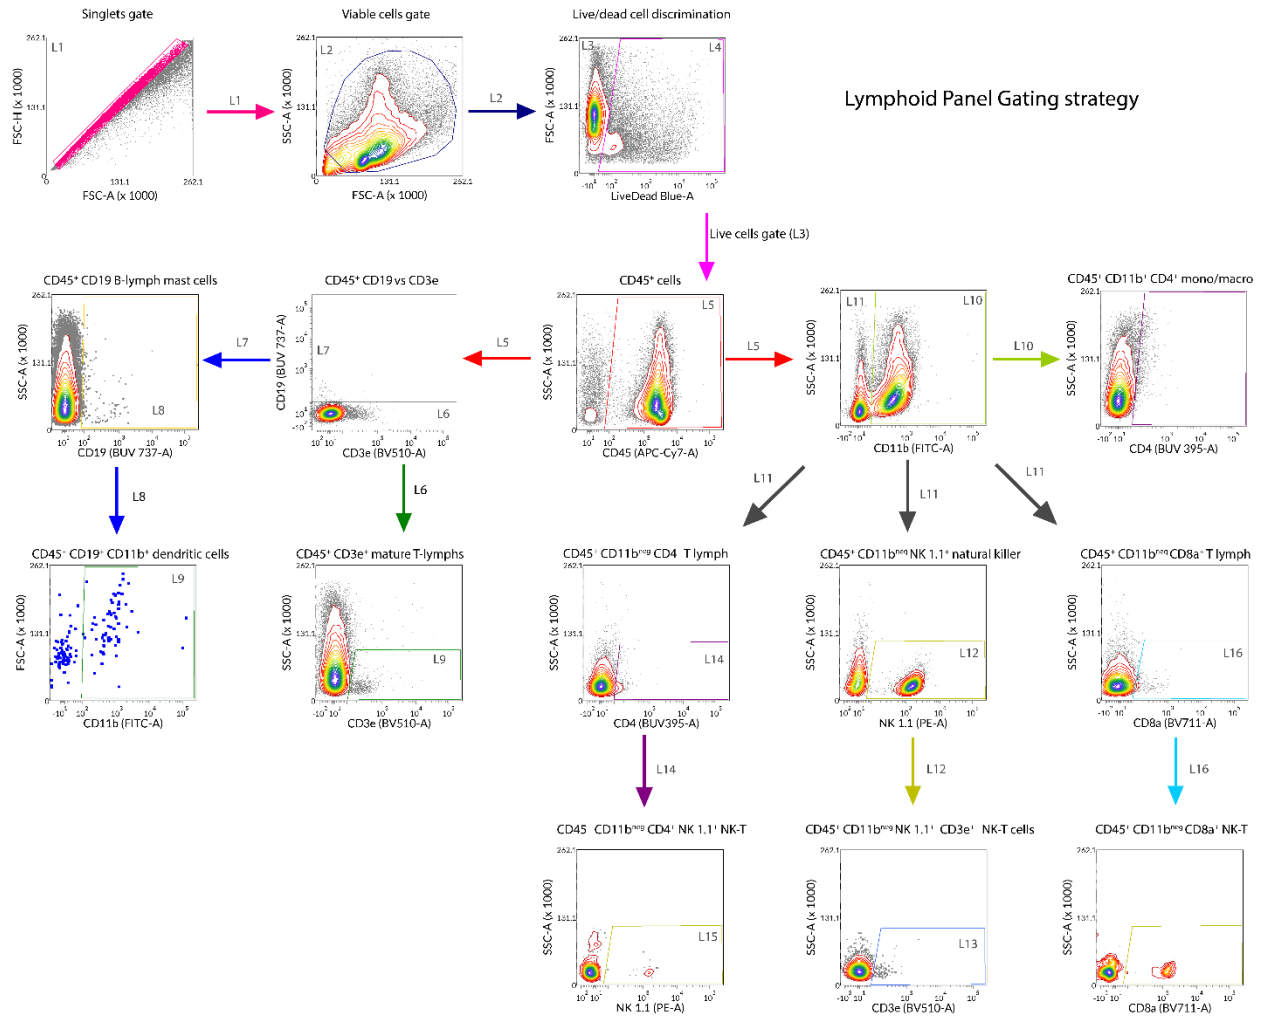

**Figure S19.** Gating strategy for the immunophenotyping of lymphoid cells in the MDP hydrogels.

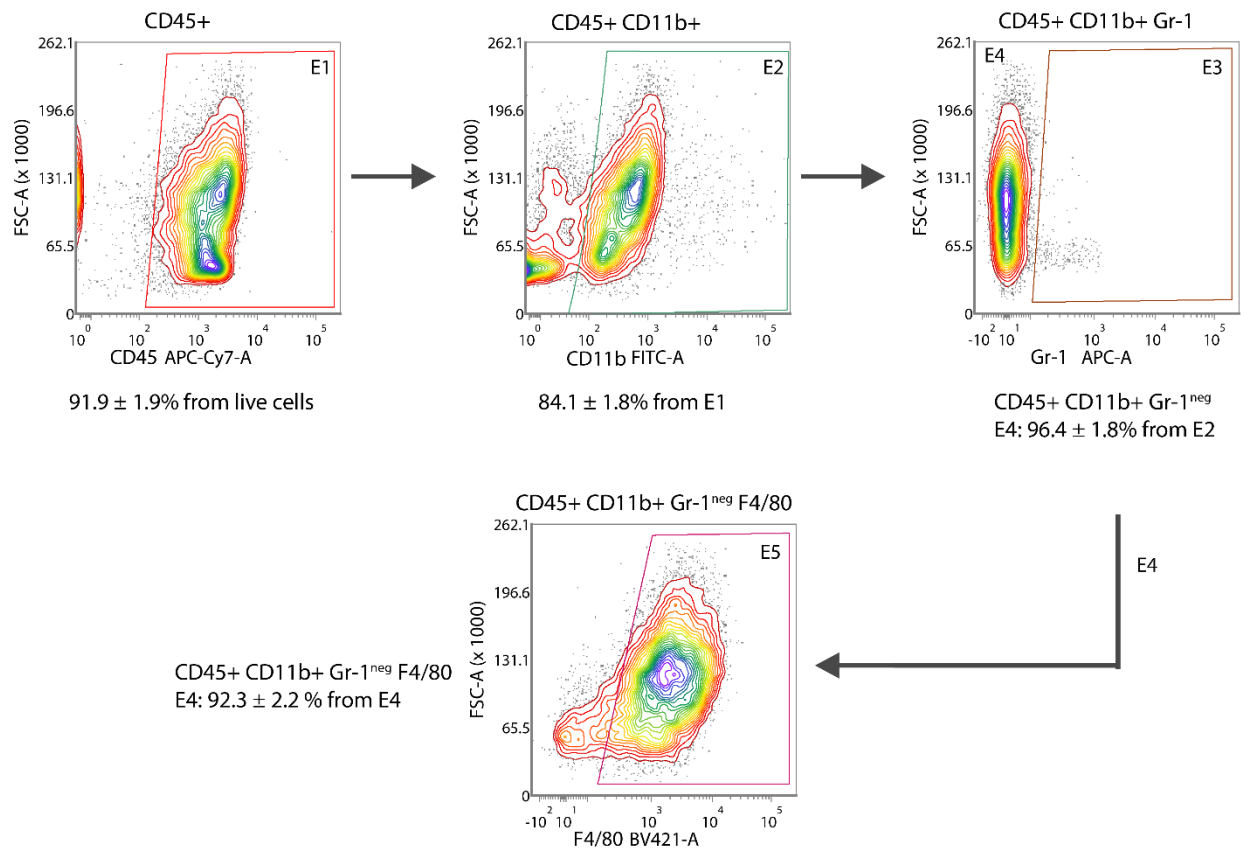

**Figure S20.** Immunophenotyping of infiltrating cells in E<sub>2</sub> implants at day 3.

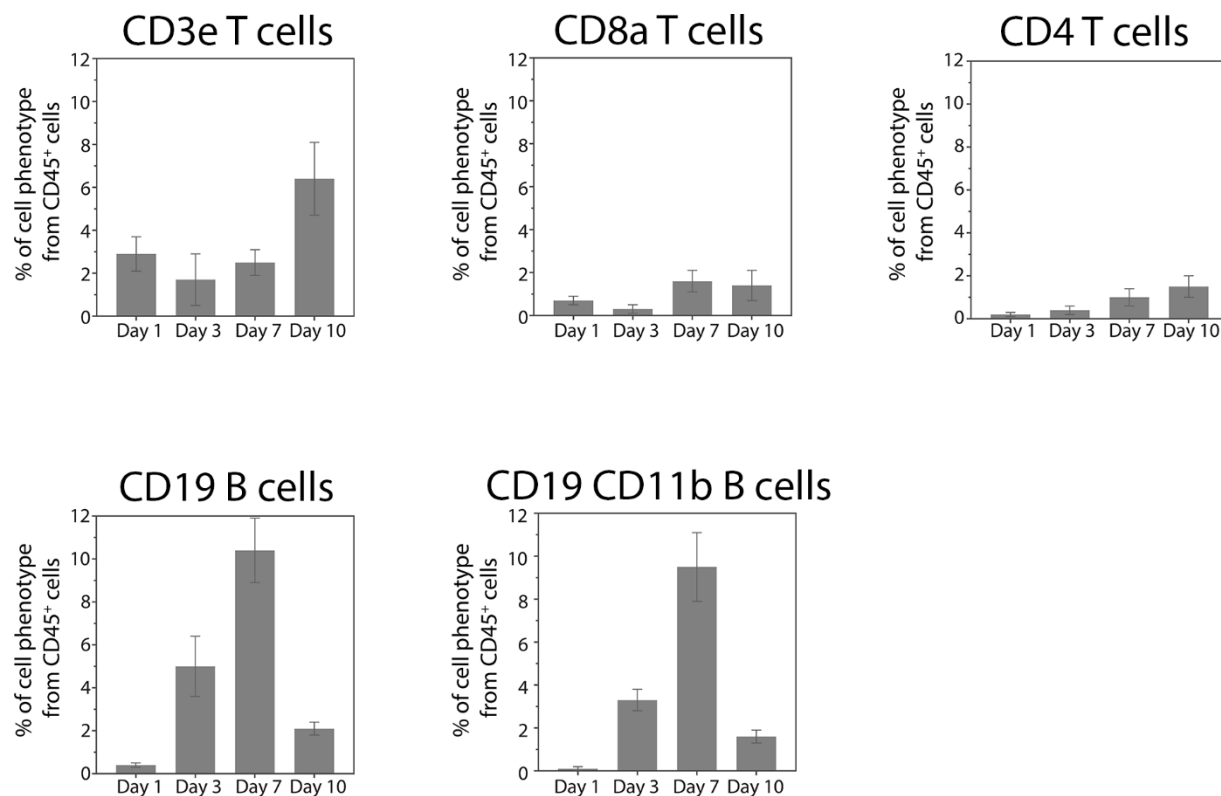

**Figure S21.** Percentage of different lymphoid cell phenotypes from CD45<sup>+</sup> cells present in K2 implants at day 1, 3, 7 and 10 post-injection.

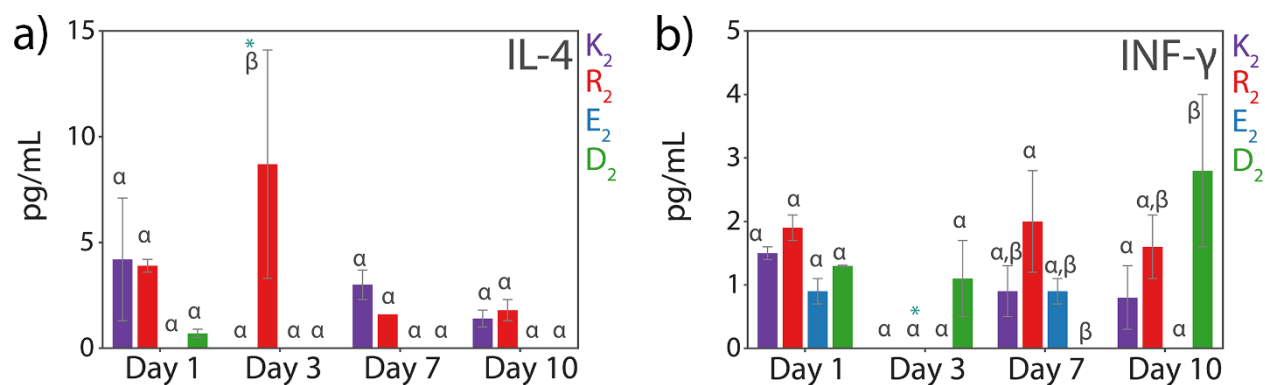

**Figure S22.** Quantification of IL-4 and INF-γ from the implant lysate.
